# Supplementary material for: Neither Trimethylamine-N-Oxide nor Trimethyllysine Is Associated with Atherosclerosis: A Cross-Sectional Study in Older Japanese Adults
Source: MDPI journal article supplement (doi:10.3390/nu15030759), 2023-02-02
Supplement: s1 [file s1]

**Table S3** Multiple linear regression analysis for IMT and PS in men.

| Variables   | IMT     |       |                  |        |         |       | PS      |       |                  |        |         |       |
|-------------|---------|-------|------------------|--------|---------|-------|---------|-------|------------------|--------|---------|-------|
|             | $\beta$ | SE    | Standard $\beta$ | t      | p-value | VIF   | $\beta$ | SE    | Standard $\beta$ | t      | p-value | VIF   |
| Carnitine   | -0.007  | 0.009 | -0.075           | -0.825 | 0.411   | 1.221 | -0.078  | 0.043 | -0.159           | -1.796 | 0.075   | 1.221 |
| $\gamma$ BB | 0.281   | 0.432 | 0.062            | 0.650  | 0.517   | 1.325 | 2.091   | 2.080 | 0.093            | 1.006  | 0.316   | 1.325 |
| TMAO        | 0.009   | 0.007 | 0.125            | 1.267  | 0.207   | 1.424 | 0.060   | 0.036 | 0.159            | 1.668  | 0.098   | 1.424 |
| TML         | -0.547  | 0.313 | -0.163           | -1.746 | 0.083   | 1.293 | -3.145  | 1.508 | -0.190           | -2.086 | 0.040   | 1.293 |
| Age         | 0.029   | 0.010 | 0.268            | 2.832  | 0.005   | 1.319 | 0.138   | 0.049 | 0.257            | 2.793  | 0.006   | 1.319 |
| BMI         | -0.024  | 0.026 | -0.084           | -0.921 | 0.359   | 1.221 | -0.187  | 0.127 | -0.130           | -1.465 | 0.145   | 1.221 |
| DL          | 0.176   | 0.191 | 0.085            | 0.922  | 0.358   | 1.252 | 1.587   | 0.920 | 0.155            | 1.725  | 0.087   | 1.252 |
| DM          | 0.073   | 0.221 | 0.031            | 0.329  | 0.743   | 1.276 | -0.119  | 1.063 | -0.010           | -0.112 | 0.911   | 1.276 |
| HT          | 0.153   | 0.179 | 0.079            | 0.857  | 0.393   | 1.261 | 1.078   | 0.860 | 0.113            | 1.254  | 0.212   | 1.261 |
| Drinker     | 0.112   | 0.163 | 0.061            | 0.685  | 0.495   | 1.151 | -0.107  | 0.786 | -0.012           | -0.136 | 0.892   | 1.151 |
| Smoker      | 0.020   | 0.288 | 0.006            | 0.068  | 0.946   | 1.123 | -0.199  | 1.387 | -0.012           | -0.144 | 0.886   | 1.123 |
| Area #1     | 0.019   | 0.171 | 0.010            | 0.108  | 0.914   | 1.283 | -0.238  | 0.825 | -0.026           | -0.289 | 0.773   | 1.283 |

#1. 0=Kakeya and 1=Oki island
