# Supplementary material for: Neither Trimethylamine-N-Oxide nor Trimethyllysine Is Associated with Atherosclerosis: A Cross-Sectional Study in Older Japanese Adults
Source: MDPI journal article supplement (doi:10.3390/nu15030759), 2023-02-02
Supplement: s1 [file s1]

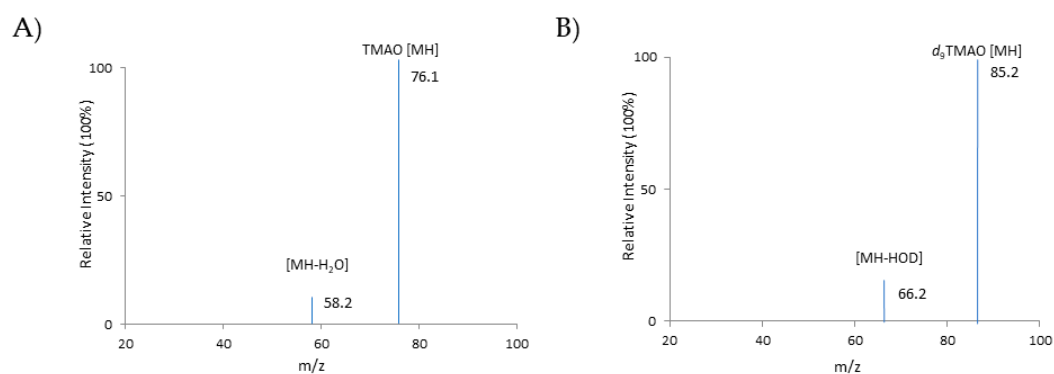

**Figure S1.** Collision-induced dissociation (CID) spectra of TMAO in tandem mass spectrometry. CID spectrum of plasma (A) and the synthetic internal standard of TMAO (B) are shown.

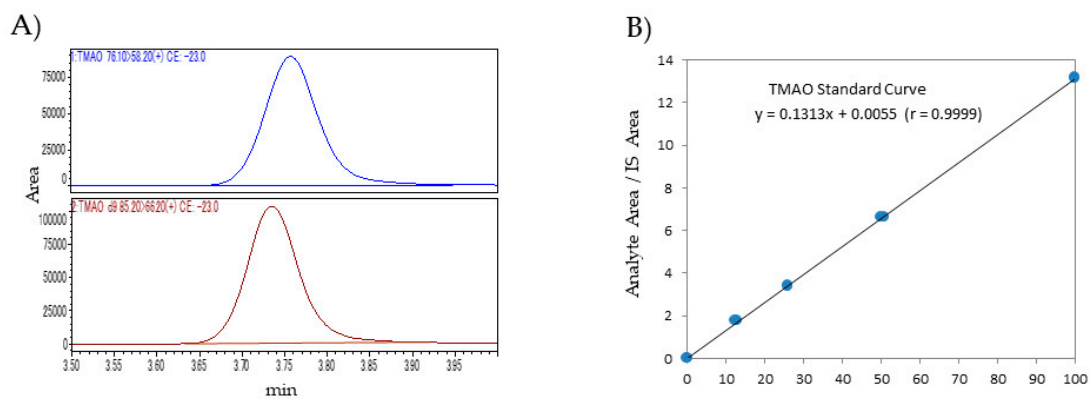

**Figure S2.** Determination of plasma concentration of TMAO with d<sub>9</sub>-TMAO as an internal standard using LC-MS/MS. (A) Peaks of plasma TMAO ( $m/z$  76) and synthetic d<sub>9</sub>-TMAO. (B) A standard curve of plasma TMAO.
