# Supplementary material for: Neither Trimethylamine-N-Oxide nor Trimethyllysine Is Associated with Atherosclerosis: A Cross-Sectional Study in Older Japanese Adults
Source: MDPI journal article supplement (doi:10.3390/nu15030759), 2023-02-02
Supplement: s1 [file s1]

**Table S2:** Simple and multiple linear regression analysis for PS in the whole participants.

| Variables   | Spearman's $\rho$ |         | Model 1 |       |                  |        |         |       | Model 2 |       |                  |        |         |       |
|-------------|-------------------|---------|---------|-------|------------------|--------|---------|-------|---------|-------|------------------|--------|---------|-------|
|             | $\rho$            | p-value | $\beta$ | SE    | Standard $\beta$ | t      | p-value | VIF   | $\beta$ | SE    | Standard $\beta$ | t      | p-value | VIF   |
| Carnitine   | 0.113             | 0.031   | 0.021   | 0.022 | 0.051            | 0.925  | 0.356   | 1.152 | 0.006   | 0.022 | 0.015            | 0.284  | 0.777   | 1.274 |
| $\gamma$ BB | 0.197             | <0.001  | 2.630   | 0.984 | 0.159            | 2.673  | 0.008   | 1.327 | 0.005   | 1.029 | 0.000            | 0.005  | 0.996   | 1.664 |
| TMAO        | -0.010            | 0.850   | 0.015   | 0.020 | 0.044            | 0.733  | 0.464   | 1.351 | 0.039   | 0.020 | 0.116            | 1.932  | 0.054   | 1.543 |
| TML         | 0.083             | 0.116   | -0.293  | 1.016 | -0.017           | -0.288 | 0.773   | 1.280 | -2.838  | 1.009 | -0.163           | -2.812 | 0.005   | 1.447 |
| Age         | 0.316             | <0.001  |         |       |                  |        |         |       | 0.122   | 0.025 | 0.262            | 4.886  | <0.001  | 1.234 |
| BMI         | 0.021             | 0.619   |         |       |                  |        |         |       | -0.037  | 0.057 | -0.035           | -0.647 | 0.518   | 1.223 |
| DL          | -0.047            | 0.371   |         |       |                  |        |         |       | 0.373   | 0.389 | 0.050            | 0.958  | 0.339   | 1.174 |
| DM          | 0.058             | 0.273   |         |       |                  |        |         |       | 0.179   | 0.543 | 0.017            | 0.329  | 0.742   | 1.096 |
| HT          | 0.235             | <0.001  |         |       |                  |        |         |       | 0.597   | 0.395 | 0.080            | 1.511  | 0.132   | 1.212 |
| Drinker     | 0.084             | 0.108   |         |       |                  |        |         |       | -0.251  | 0.492 | -0.029           | -0.512 | 0.609   | 1.330 |
| Smoker      | 0.019             | 0.718   |         |       |                  |        |         |       | 0.329   | 0.908 | 0.018            | 0.363  | 0.717   | 1.074 |
| Sex #1      | 0.252             | <0.001  |         |       |                  |        |         |       | 2.440   | 0.484 | 0.330            | 5.042  | <0.001  | 1.839 |
| Area #2     | -0.024            | 0.647   |         |       |                  |        |         |       | -0.036  | 0.391 | -0.005           | -0.092 | 0.927   | 1.236 |

In Model 1, only the L-carnitine-related metabolites were included in the analysis. In Model 2, all the parameters shown in the left column were included. #1. 0=Women and 1=Men, #2. 0=Takeya and 1=Oki Island.
