# Supplementary material for: Neither Trimethylamine-N-Oxide nor Trimethyllysine Is Associated with Atherosclerosis: A Cross-Sectional Study in Older Japanese Adults
Source: MDPI journal article supplement (doi:10.3390/nu15030759), 2023-02-02
Supplement: s1 [file s1]

**Table S1:** Correlation analysis of the carnitine-related metabolites in all participants

| Model 1     | Carnitine | $\gamma$ BB | TMAO   | TML    |
|-------------|-----------|-------------|--------|--------|
| Carnitine   | -         | 0.38**      | 0.13*  | 0.23** |
| $\gamma$ BB | 0.38**    | -           | 0.29** | 0.33** |
| TMAO        | 0.13*     | 0.29**      | -      | 0.50** |
| Age         | 0.02      | 0.14**      | 0.08   | 0.23** |
| BMI         | 0.17**    | 0.02        | 0.13*  | 0.10   |

Pearson's r is indicated in the table. \*  $p < 0.05$ , \*\*  $p < 0.001$ . For this analysis, Pearson's correlation was applied after the log transformation of blood levels of carnitine and the metabolites.
