# Supplementary material for: Neither Trimethylamine-N-Oxide nor Trimethyllysine Is Associated with Atherosclerosis: A Cross-Sectional Study in Older Japanese Adults
Source: Nutrients. 2023 Feb 2;15(3):759. doi: 10.3390/nu15030759 (PMC9921512; doi:10.3390/nu15030759)
Supplement: Supplementary file 1 [file nutrients-15-00759-s001.zip]

Archive with 4 entries (4 files):
- nutrients-2191597-Supplementary Figure.pdf
- Table S1.pdf
- Table S2.pdf
- Table S3.pdf
